# Supplementary material
Source: Springer Nature journal article supplement (https://www.springermedizin.de/resource/supplementary/13054_2007_6312_MOESM1_ESM.pdf/9727180)
Supplement: MOESM1 [file 9727180]

© 2004

Intensive Care National Audit & Research Centre

All rights reserved.
